# Supplementary material
Source: ML conference proceedings conference paper supplement (https://www.ecva.net/papers/eccv_2020/papers_ECCV/html/123670154_ECCV_2020_paper.php)
Supplement: Supplementary file 1 [file 123670154-supp.pdf]

As mentioned in our paper, we established an image dataset with the manually extracted lines as well as ground truth vanishing points. We are organizing this dataset. It will be publicly available on our project website:

[https://sites.google.com/view/haoangli/projects/eccv20\\_vp](https://sites.google.com/view/haoangli/projects/eccv20_vp)

We present some sample images as follows.

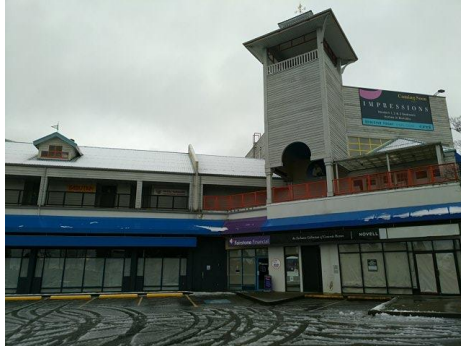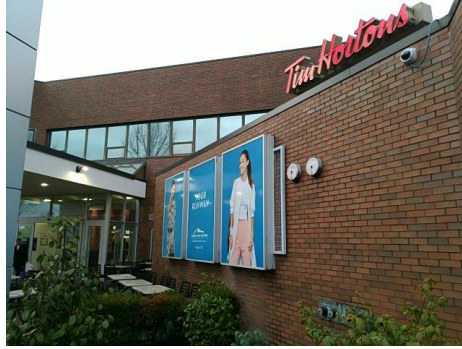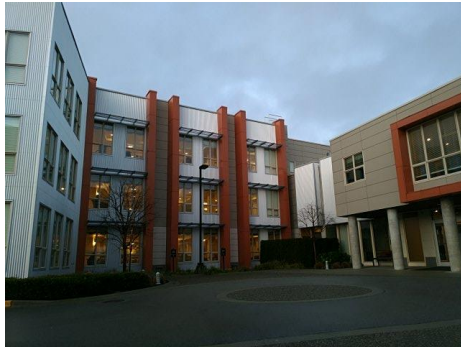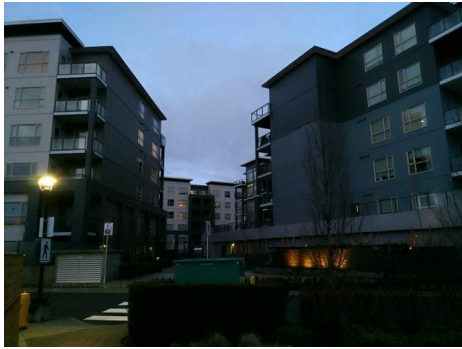

If you have any questions regarding this dataset, please feel free to contact Pyojin Kim ([pjinkim1215@gmail.com](mailto:pjinkim1215@gmail.com)) and Haoang Li ([haoang.li.cuhk@gmail.com](mailto:haoang.li.cuhk@gmail.com)).
